# Supplementary material
Source: HighWire-hosted journal article supplement (https://erj.ersjournals.com/content/60/2/2102523)

**Supplementary Table S1** Treatments received before and after randomization until Day 14. Values are n (%).

**A Tocilizumab.**

| Time from randomization | Tocilizumab<br>(N=49) |         |         | UC<br>(N=43) |         |         |
|-------------------------|-----------------------|---------|---------|--------------|---------|---------|
|                         | Before                | After   | Any     | Before       | After   | Any     |
| Anticoagulants          | 17 (35)               | 24 (49) | 34 (69) | 14 (40)      | 20 (47) | 29(67)  |
| Antibiotics             | 36 (73)               | 32 (65) | 46 (94) | 27 (63)      | 31 (72) | 38 (88) |
| - Azithromycin          | 5 (10)                | 1 (2)   | 5 (10)  | 6 (14)       | 3 (7)   | 8 (19)  |
| Hydroxychloroquine      | 10 (20)               | 0 (0)   | 10 (20) | 6 (14)       | 0 (0)   | 6 (14)  |
| Antiviral drugs         | 5 (10)                | 3 (6)   | 8 (16)  | 3 (7)        | 2 (5)   | 4 (9)   |
| - Lopinavir/Ritonavir   | 2 (4)                 | 3 (6)   | 5 (10)  | 1 (2)        | 1 (2)   | 2 (5)   |
| - Osteltamivir          | 3 (6)                 | 0 (0)   | 3 (6)   | 2 (5)        | 1 (2)   | 2 (5)   |
| Immuno-modulators       | 0 (0)                 | 0 (0)   | 0 (0)   | 0 (0)        | 1 (2) * | 1 (2) * |
| Corticosteroids         | 8 (16)                | 17 (35) | 20 (41) | 4 (9)        | 14 (33) | 17 (40) |
| - Dexamethasone         | 0 (0)                 | 3 (6)   | 3 (6)   | 0 (0)        | 1 (2)   | 1 (2)   |

\* Tocilizumab provided at day 4 and at day 6

**B Sarilumab.**

| Time from randomization | Sarilumab<br>(N=48) |         |         | UC<br>(N=33) |         |         |
|-------------------------|---------------------|---------|---------|--------------|---------|---------|
|                         | Before              | After   | Any     | Before       | After   | Any     |
| Anticoagulants          | 26 (55)             | 29 (62) | 43 (91) | 17 (52)      | 19 (58) | 30 (91) |
| Antibiotics             | 24 (51)             | 28 (60) | 34 (72) | 18(55)       | 23 (70) | 30 (91) |
| - Azithromycin          | 7 (15)              | 1 (2)   | 8 (17)  | 3 ( )        | 1 (3)   | 4 (12)  |
| Hydroxychloroquine      | 3 (6)               | 3 (6)   | 6 (13)  | 2 (6)        | 1 (3)   | 3 (9)   |
| Antiviral drugs         | 2 (4)               | 1 (2)   | 3 (7)   | 1 (3)        | 0 (0)   | 1 (3)   |
| - Lopinavir/Ritonavir   | 2 (4)               | 1 (2)   | 3 (7)   | 1 (3)        | 0 (0)   | 1 (3)   |
| Immuno-modulators       | 0 (0)               | 0 (0)   | 0 (0)   | 0 (0)        | 0 (0)   | 0 (0)   |
| Corticosteroids         | 0 (0)               | 10 (21) | 10 (21) | 2 (6)        | 6 (18)  | 7 (21)  |
| - Dexamethasone         | 0 (0)               | 1 (2)   | 1 (2)   | 0 (0)        | 1 (3)   | 1 (3)   |

## Supplementary Table S2. Day 4 outcome

### A TOCILZUMAB

|                              | Tocilizumab  | Usual care   | Risk Difference | Adjusted Odds Ratio |
|------------------------------|--------------|--------------|-----------------|---------------------|
| N                            | 49           | 43           |                 |                     |
| N (%) not improved           | 35 (71%)     | 30 (70%)     |                 |                     |
| Posterior Median             | 70.9%        | 69.2         | +1.7%           | 1.04                |
| 90% CrI                      |              |              | -13.6 to +17.1  | 0.47 to 2.29        |
| 95% CrI                      | 57.5 to 82.1 | 54.8 to 81.4 | -16.4 to +20.0  | 0.40 to 2.65        |
| Posterior probabilities*     |              |              |                 |                     |
| P(any benefit)               |              |              | 0.429           | 0.465               |
| P(at least moderate benefit) |              |              | 0.220           | 0.333               |

P(any benefit)=P(RD<0) or P(OR<1), P(at least moderate benefit)=P(RD<5.5%) or P(OR<0.85)

### B SARILUMAB

|                              | Sarilumab    | Usual care   | Risk Difference | Adjusted Odds Ratio |
|------------------------------|--------------|--------------|-----------------|---------------------|
| N                            | 48           | 33           |                 |                     |
| N (%) not improved           | 34 (71%)     | 26 (79%)     |                 |                     |
| Posterior Median             | 70.3%        | 77.7         | -7.3%           | 0.57                |
| 90% CrI                      |              |              | -22.5 to +8.7   | 0.21 to 1.42        |
| 95% CrI                      | 56.7 to 81.7 | 62.1 to 89.3 | -25.3 to +11.9  | 0.17 to 1.69        |
| Posterior probabilities*     |              |              |                 |                     |
| P(any benefit)               |              |              | 0.777           | 0.846               |
| P(at least moderate benefit) |              |              | 0.575           | 0.764               |

P(any benefit)=P(RD<0) or P(OR<1), P(at least moderate benefit)=P(RD<5.5%) or P(OR<0.85)

**Supplementary Table S3.** Summary of the posterior distribution of the hazard ratio (HR) adjusted for age and center. A HR>1 indicates efficacy of tocilizumab or sarilumab.

**A TOCILIZUMAB**

| Parameter      | Value        |
|----------------|--------------|
| Median HR      | 1.19         |
| 90% CrI        | 0.71 to 2.04 |
| 95% CrI        | 0.64 to 2.27 |
| P(HR > 1)      | 0.714        |
| P(HR > 1/0.95) | 0.656        |
| P(HR > 1/0.85) | 0.519        |
| P(HR > 1/0.8)  | 0.443        |

**B SARILUMAB**

| Parameter      | Value        |
|----------------|--------------|
| Median HR      | 1.05         |
| 90% CrI        | 0.55 to 2.07 |
| 95% CrI        | 0.49 to 2.37 |
| P(HR > 1)      | 0.549        |
| P(HR > 1/0.95) | 0.498        |
| P(HR > 1/0.85) | 0.389        |
| P(HR > 1/0.8)  | 0.334        |

**Supplementary Table S4.** Summary of the posterior distribution of the unadjusted hazard ratio (HR). A HR>1 indicates efficacy of tocilizumab or sarilumab

**A TOCILIZUMAB**

| Parameter      | Value        |
|----------------|--------------|
| Median HR      | 1.20         |
| 90% CrI        | 0.72 to 2.04 |
| 95% CrI        | 0.65 to 2.27 |
| P(HR > 1)      | 0.719        |
| P(HR > 1/0.95) | 0.662        |
| P(HR > 1/0.85) | 0.527        |
| P(HR > 1/0.8)  | 0.451        |

**B SARILUMAB**

| Parameter      | Value        |
|----------------|--------------|
| Median HR      | 1.17         |
| 90% CrI        | 0.63 to 2.26 |
| 95% CrI        | 0.56 to 2.59 |
| P(HR > 1)      | 0.662        |
| P(HR > 1/0.95) | 0.610        |
| P(HR > 1/0.85) | 0.496        |
| P(HR > 1/0.8)  | 0.433        |

**Supplementary Table S5: Subgroup analyses for the primary outcome (TOCI-2 protocol)**

Analyses according to antivirals at baseline were pre-specified in the protocol, but only 8 patients (5 tocilizumab, 3 usual care) were on antivirals at randomization.

Additional analyses according to corticosteroids and dexamethasone were added post-hoc to the SAP hoc in the light of publications or press releases. No patient was on dexamethasone at randomization, and only 12 (8 tocilizumab, 4 usual care) were receiving corticosteroids. Accordingly, no subgroup analysis was performed.

Post-hoc subgroup analyses according to the WHO-CPS score and the time from ICU admission to randomization ( $\leq 1$  day vs.  $> 1$  day) have been performed, as requested by the trial Scientific Committee.

| Subgroup                       | Tocilizumab (n=49) | Usual care (n=43) | Adjusted HR (95% CI) | Interaction P-value |
|--------------------------------|--------------------|-------------------|----------------------|---------------------|
|                                | N events/N (%)     | N events/N (%)    |                      |                     |
| Antivirals at baseline         |                    |                   |                      | —                   |
| Yes                            | 1/5 (20%)          | 2/3 (67%)         | —                    |                     |
| No                             | 22/44 (50%)        | 16/40 (40%)       | —                    |                     |
| Corticosteroids at baseline    |                    |                   |                      | —                   |
| Yes                            | 2/8 (25%)          | 1/4 (25%)         | —                    |                     |
| No                             | 21/41 (51%)        | 17/39 (44%)       | —                    |                     |
| Dexamethasone at baseline      |                    |                   |                      | —                   |
| Yes                            | 0/0 (—)            | 0/0 (—)           | —                    |                     |
| No                             | 23/49 (47%)        | 18/43 (42%)       | —                    |                     |
| Delay from ICU admission*      |                    |                   |                      | 0.15                |
| $\leq 1$ day                   | 13/25 (52%)        | 6/16 (38%)        | 1.75 (0.63 to 4.83)  |                     |
| $> 1$ day                      | 4/17 (24%)         | 8/22 (36%)        | 0.58 (0.17 to 1.93)  |                     |
| WHO-CPS score at randomization |                    |                   |                      | 0.65                |
| 6                              | 11/13 (85%)        | 8/12 (67%)        | 1.60 (0.61 to 4.20)  |                     |
| $\geq 7$                       | 12/36 (33%)        | 10/31 (32%)       | 1.12 (0.48 to 2.62)  |                     |
| CRP**                          |                    |                   |                      | 0.002               |
| $\leq 150$ mg/L                | 14/19 (74%)        | 2/13 (15%)        | 6.60 (2.50 to 17.4)  |                     |
| $> 150$ mg/L                   | 9/26 (35%)         | 11/20 (55%)       | 0.36 (0.15 to 0.83)  |                     |

\* Excluded 7 and 4 patients not in the ICU at randomization in the tocilizumab and usual care arm, respectively, and 1 patient with unknown date of ICU admission. \*\* 4 and 10 missing data in the tocilizumab and usual care arm, respectively.

**Supplementary Table S6 : Subgroup analyses for the primary outcome (SARI-2 protocol)**

Analyses according to antivirals at baseline were pre-specified in the protocol, but only 3 patients (2 sarilumab, 1 usual care) were on antivirals at randomization.

Additional analyses according to corticosteroids and dexamethasone were added post-hoc to the SAP in the light of publications. No patient was on dexamethasone at randomization, and only 2 (0 sarilumab, 2 usual care) were receiving corticosteroids.

Accordingly, no subgroup analysis stratified on these variables was performed.

Post-hoc subgroup analyses according to the WHO-CPS score and the time from ICU admission to randomization ( $\leq 1$  day vs.  $> 1$  day) have been performed, as requested by the trial Scientific Committee.

| Subgroup                          | Sarilumab<br>(n=48) | Usual care<br>(n=33) | Adjusted HR (95%<br>CI) | Interaction<br>P-value |
|-----------------------------------|---------------------|----------------------|-------------------------|------------------------|
|                                   | N events/N (%)      | N events/N (%)       |                         |                        |
| Antivirals at baseline            |                     |                      |                         | —                      |
| Yes                               | 0/2 (0%)            | 0/1 (0%)             | —                       |                        |
| No                                | 18/46 (39%)         | 11/32 (34%)          | —                       |                        |
| Corticosteroids at baseline       |                     |                      |                         | —                      |
| Yes                               | 0/0 (—)             | 1/2 (50%)            | —                       |                        |
| No                                | 18/48 (38%)         | 10/31 (32%)          | —                       |                        |
| Dexamethasone at baseline         |                     |                      |                         | —                      |
| Yes                               | 0/0 (—)             | 0/0 (—)              | —                       |                        |
| No                                | 18/48 (38%)         | 11/33 (33%)          | —                       |                        |
| Delay from ICU admission*         |                     |                      |                         | 0.086                  |
| $\leq 1$ day                      | 1/11 (9%)           | 3/10 (30%)           | 0.22 (0.022 to<br>2.26) |                        |
| $> 1$ day                         | 11/27 (41%)         | 4/18 (22%)           | 1.78 (0.54 to<br>5.80)  |                        |
| WHO-CPS score at<br>randomization |                     |                      |                         | 0.074                  |
| 6                                 | 8/16 (50%)          | 7/9 (78%)            | 0.45 (0.16 to<br>1.30)  |                        |
| $\geq 7$                          | 10/32 (31%)         | 10/24 (17%)          | 1.84 (0.57 to<br>4.98)  |                        |
| CRP**                             |                     |                      |                         | 0.78                   |
| $\leq 150$ mg/L                   | 8/14 (57%)          | 5/10 (50%)           | 1.17 (0.41 to<br>3.32)  |                        |
| $> 150$ mg/L                      | 10/34 (29%)         | 6/21 (29%)           | 1.00 (0.31 to<br>3.24)  |                        |

\* Excluded 10 and 5 patients not in the ICU at randomization in the sarilumab and usual care arm, respectively.

\*\* Two missing data

**Supplementary Table S7.** WHO scores during follow-up. OR was obtained from Bayesian proportional odds models adjusted for baseline WHO-CPS score, age and center. For longitudinal data, time was used as a main effect in the model. No imputation was performed, but a window of plus/minus 2 days was used for day 14 scores.

### A TOCILIZUMAB

|                       | Tocilizumab (n=49) |              | Usual care (n=43) |              | Adjusted OR (95% CrI) |
|-----------------------|--------------------|--------------|-------------------|--------------|-----------------------|
|                       | N                  | Median (IQR) | N                 | Median (IQR) |                       |
| Day 1                 | 49                 | 7 (6 to 8)   | 43                | 8 (6 to 8)   | —                     |
| Day 4                 | 49                 | 7 (7 to 8)   | 43                | 8 (7 to 8)   | 0.85 (0.39 to 1.82)   |
| Day 7                 | 48                 | 7 (5 to 8)   | 43                | 8 (7 to 8)   | 0.69 (0.32 to 1.47)   |
| Day 14                | 48                 | 7 (5 to 8)   | 43                | 7 (5 to 9)   | 0.68 (0.32 to 1.43)   |
| Longitudinal analysis | 49                 | -            | 43                | -            | 0.76 (0.27 to 2.13)   |

### B SARILUMAB

|                       | Sarilumab (n=48) |              | Usual care (n=33) |              | Adjusted OR (95% CrI) |
|-----------------------|------------------|--------------|-------------------|--------------|-----------------------|
|                       | N                | Median (IQR) | N                 | Median (IQR) |                       |
| Day 1                 | 48               | 8 (6 to 8)   | 33                | 7 (6 to 8)   | —                     |
| Day 4                 | 48               | 7 (7 to 8)   | 33                | 8 (7 to 8)   | 0.88 (0.38 to 2.02)   |
| Day 7                 | 48               | 8 (7 to 8)   | 33                | 8 (7 to 8)   | 1.07 (0.47 to 2.40)   |
| Day 14                | 47               | 7 (5 to 10)  | 33                | 7 (5 to 10)  | 1.13 (0.50 to 2.57)   |
| Longitudinal analysis | 48               | —            | 33                | —            | 0.72-2.21 to 2.41)    |

### Supplementary Table S8. Day 28 ventilator-free days

For patients not ventilated at baseline, the time before ventilation (if it occurred) was considered as ventilator-free. Those never intubated during the first 28 days had 28 ventilator-free days. In all cases, the time horizon (28 days) was counted from randomization. A separate analysis was performed excluding patients not ventilated at randomization (WHO-CPS scores 6). Results are mean (SD). Confidence intervals were obtained by bootstrapping.

#### A TOCILIZUMAB

|                  | Tocilizumab |              | Usual care |              | Mean difference<br>(95% CI) |
|------------------|-------------|--------------|------------|--------------|-----------------------------|
|                  | N           | CIF (95% CI) | N          | CIF (95% CI) |                             |
| All patients     | 49          | 12.8 (10.7)  | 43         | 10.3 (11.1)  | -2.5 (-6.9 to +1.7)         |
| WHO-CPS $\geq$ 7 | 36          | 9.8 (9.5)    | 31         | 7.2 (9.4)    | -2.5 (-6.6 to +2.7)         |

#### B SARILUMAB

|                  | Sarilumab |             | Usual care |            | Mean difference<br>(95% CI) |
|------------------|-----------|-------------|------------|------------|-----------------------------|
|                  | N         | Mean (SD)   | N          | Mean (SD)  |                             |
| All patients     | 48        | 10.3 (11.1) | 33         | 8.7 (11.0) | -1.5 (-6.1 to +3.9)         |
| WHO-CPS $\geq$ 7 | 32        | 7.5 (9.5)   | 24         | 4.6 (7.6)  | -2.9 (-7.4 to +1.7)         |



**Supplementary Table S9. Cumulative incidence of oxygen supply independency until 28 days.** CIF: cumulative incidence function.

**A TOCILIZUMAB**

|        | Tocilizumab (n=49) |                | Usual care (n=43) |                | Adjusted HR (95% CI) |
|--------|--------------------|----------------|-------------------|----------------|----------------------|
|        | N events           | CIF (95% CI)   | N events          | CIF (95% CI)   |                      |
| Day 14 | 13                 | 26% (15 to 40) | 7                 | 16% (7 to 29)  | —                    |
| Day 28 | 29                 | 59% (44 to 72) | 21                | 49% (33 to 63) | 1.44 (0.82 to 2.52)  |
| Day 90 | 34                 | 69% (53 to 80) | 28                | 64% (47 to 77) | 1.28 (0.80 to 2.03)  |

**B SARILUMAB**

|        | Sarilumab (n=48) |                | Usual care (n=33) |                | Adjusted HR (95% CI) |
|--------|------------------|----------------|-------------------|----------------|----------------------|
|        | N events         | CIF (95% CI)   | N events          | CIF (95% CI)   |                      |
| Day 14 | 12               | 25% (14 to 38) | 6                 | 18% (7 to 33)  | —                    |
| Day 28 | 21               | 44% (29 to 57) | 12                | 36% (20 to 53) | 1.20 (0.59 to 2.44)  |
| Day 90 | 33               | 71% (52 to 83) | 18                | 56% (35 to 72) | 1.29 (0.74 to 2.25)  |

**Supplementary Table S10. Cumulative incidence of discharge. CIF: cumulative incidence function.**

**A TOCILIZUMAB**

|        | Tocilizumab (n=49) |                | Usual care (n=43) |                | Adjusted HR (95% CI) |
|--------|--------------------|----------------|-------------------|----------------|----------------------|
|        | N events           | CIF (95% CI)   | N events          | CIF (95% CI)   |                      |
| Day 14 | 13                 | 26% (15 to 40) | 7                 | 16% (7 to 29)  | —                    |
| Day 28 | 29                 | 59% (44 to 72) | 21                | 49% (33 to 63) | 1.44 (0.82 to 2.52)  |
| Day 90 | 34                 | 69% (53 to 80) | 28                | 64% (47 to 77) | 1.28 (0.80 to 2.03)  |

**B SARILUMAB**

|        | Sarilumab (n=48) |                | Usual care (n=33) |                | Adjusted HR (95% CI) |
|--------|------------------|----------------|-------------------|----------------|----------------------|
|        | N events         | CIF (95% CI)   | N events          | CIF (95% CI)   |                      |
| Day 14 | 12               | 25% (14 to 38) | 6                 | 18% (7 to 33)  | —                    |
| Day 28 | 21               | 44% (29 to 57) | 12                | 36% (20 to 53) | 1.20 (0.59 to 2.44)  |
| Day 90 | 33               | 71% (52 to 83) | 18                | 56% (35 to 72) | 1.29 (0.74 to 2.25)  |

**Supplementary Table S11. Cumulative incidence of ICU discharge for patients in the ICU at inclusion.** CIF: cumulative incidence function.

**A TOCILIZUMAB**

|        | Tocilizumab (n=40) |                | Usual care (n=37) |                | Adjusted HR (95% CI) |
|--------|--------------------|----------------|-------------------|----------------|----------------------|
|        | N events           | CIF (95% CI)   | N events          | CIF (95% CI)   |                      |
| Day 14 | 16                 | 40% (25 to 55) | 16                | 43% (27 to 58) | —                    |
| Day 28 | 29                 | 72% (55 to 84) | 22                | 60% (42 to 74) | 1.28 (0.73 to 2.24)  |
| Day 90 | 33                 | 84% (66 to 93) | 30                | 83% (63 to 93) | 1.15 (0.73 to 1.81)  |

**B SARILUMAB**

|        | Sarilumab (n=38) |                | Usual care (n=28) |                | Adjusted HR (95% CI) |
|--------|------------------|----------------|-------------------|----------------|----------------------|
|        | N events         | CIF (95% CI)   | N events          | CIF (95% CI)   |                      |
| Day 14 | 16               | 42% (26 to 57) | 14                | 50% (30 to 67) | —                    |
| Day 28 | 23               | 60% (43 to 74) | 20                | 71% (50 to 85) | 0.78 (0.42 to 1.44)  |
| Day 90 | 30               | 79% (61 to 89) | 23                | 82% (57 to 93) | 0.84 (0.49 to 1.47)  |

**Supplementary Table S12. Overall survival at 14, 28 and 90 days.**

**A TOCILIZUMAB**

|        | Tocilizumab (n=49) |                | Usual care (n=43) |                | Adjusted HR (95% CI) |
|--------|--------------------|----------------|-------------------|----------------|----------------------|
|        | N deaths           | OS (95% CI)    | N deaths          | OS (95% CI)    |                      |
| Day 14 | 5                  | 90% (82 to 99) | 9                 | 79% (68 to 92) | 0.37 (0.12 to 1.15)  |
| Day 28 | 8                  | 84% (74 to 95) | 10                | 77% (65 to 90) | 0.56 (0.22 to 1.46)  |
| Day 90 | 12                 | 76% (64 to 89) | 13                | 70% (57 to 85) | 0.67 (0.30 to 1.49)  |

**B SARILUMAB**

|        | Sarilumab (n=48) |                | Usual care (n=33) |                | Adjusted HR (95% CI) |
|--------|------------------|----------------|-------------------|----------------|----------------------|
|        | N deaths         | OS (95% CI)    | N deaths          | OS (95% CI)    |                      |
| Day 14 | 12               | 75% (64 to 88) | 9                 | 73% (59 to 90) | 0.95 (0.40 to 2.25)  |
| Day 28 | 14               | 71% (59 to 85) | 11                | 67% (52 to 85) | 0.89 (0.40 to 1.96)  |
| Day 90 | 14               | 71% (59 to 85) | 13                | 61% (46 to 80) | 0.74 (0.35 to 1.58)  |

**Supplementary Table S13. Serious adverse events and causes of deaths.**

**A TOCILIZUMAB**

|                                  | <b>Tocilizumab<br/>(N=49)</b> | <b>UC<br/>(N=43)</b> | <b>P</b> |
|----------------------------------|-------------------------------|----------------------|----------|
| <b>Adverse events</b>            |                               |                      |          |
| - Patients with at least one AE* | 33 (67%)                      | 30 (70%)             | 0.83*    |
| - Patients with multiple AE      | 24 (49%)                      | 24 (56%)             |          |
| - Number of events**             | 176                           | 177                  | 0.20**   |
| <b>Serious adverse events</b>    |                               |                      |          |
| - Patients with at least one SAE | 31 (63%)                      | 27 (63%)             | 1.00*    |
| - Patients with multiple SAE     | 19 (39%)                      | 23 (9%)              |          |
| - Number of events               | 93                            | 55                   | 0.020**  |
| Angina                           | 1                             | 0                    |          |
| Arthritis                        | 1                             | 0                    |          |
| Hemorrhagic stroke               | 1                             | 2                    |          |
| Ischemic stroke                  | 1                             | 2                    |          |
| Hypovolemic shock                | 1                             | 0                    |          |
| Diabetes                         | 1                             | 0                    |          |
| Anemia                           | 7                             | 7                    |          |
| Hepatic cholestasis              | 3                             | 2                    |          |
| Hepatic cytolysis                | 9                             | 3                    |          |
| Pneumothorax                     | 1                             | 1                    |          |
| Pulmonary embolism               | 4                             | 1                    |          |
| Thrombophlebitis                 | 1                             | 0                    |          |
| Thrombopenia                     | 1                             | 1                    |          |
| ARDS                             | 13                            | 15                   |          |
| Bacterial sepsis                 | 25                            | 12                   |          |
| Fungal sepsis                    | 2                             | 1                    |          |
| Severe acute pancreatitis        | 1                             | 0                    |          |
| Thrombopenia                     | 1                             | 0                    |          |
| Neutropenia                      | 1                             | 0                    |          |
| Renal failure                    | 4                             | 4                    |          |
| Adrenal insufficiency            | 1                             | 0                    |          |
| Hyperleukocytosis                | 1                             | 0                    |          |
| Arterial hypertension            | 1                             | 0                    |          |
| Metabolic acidosis               | 1                             | 0                    |          |
| Guillain Barré syndrome          | 1                             | 0                    |          |
| Hemoptysis                       | 1                             | 0                    |          |
| Gastrointestinal bleeding        | 1                             | 0                    |          |
| Bleeding                         | 1                             | 0                    |          |
| Limb ischemia                    | 1                             | 0                    |          |
| Neuropathy                       | 1                             | 0                    |          |
| Acute pulmonary oedema           | 2                             | 0                    |          |
| Tracheotomy                      | 1                             | 1                    |          |
| Psoas hematoma                   | 1                             | 0                    |          |
| Bradycardia                      | 0                             | 1                    |          |
| Heart failure                    | 0                             | 1                    |          |

|                        | <b>Tocilizumab<br/>(N=49)</b> | <b>UC<br/>(N=43)</b> | <b><i>P</i></b> |
|------------------------|-------------------------------|----------------------|-----------------|
| Facial paralysis       | 0                             | 1                    |                 |
| Death                  | 12 (24%)                      | 13 (30%)             |                 |
| - Causes               |                               |                      |                 |
| ARDS                   | 7                             | 7                    |                 |
| Bacterial sepsis       | 2                             | 2                    |                 |
| Fungal sepsis          | 0                             | 1                    |                 |
| Multiple organ failure | 0                             | 1                    |                 |
| Hemorrhagic stroke     | 1                             | 2                    |                 |
| Pulmonary embolism     | 2                             | 0                    |                 |

\* Fisher's exact test

\*\* Poisson model

## B SARILUMAB

|                                  | Sarilumab<br>(N=48) | UC<br>(N=33) | P        |
|----------------------------------|---------------------|--------------|----------|
| <b>Adverse events</b>            |                     |              |          |
| - Patients with at least one AE* | 32 (68%)            | 22 (68%)     | 1.00*    |
| - Patients with multiple AE      | 18 (38%)            | 17 (52%)     |          |
| - Number of events**             | 79                  | 67           | 0.2062** |
| <b>Serious adverse events</b>    |                     |              |          |
| - Patients with at least one SAE | 31 (64.6%)          | 19 (57.6%)   | 0.6426*  |
| - Patients with multiple SAE     | 14 (29.2%)          | 7 (21.2%)    |          |
| - Number of events               | 69                  | 34           | 0.1119** |
| Acidosis                         | 1                   | 0            |          |
| Allergy to sarilumab             | 1                   | 0            |          |
| Severe constipation              | 1                   | 0            |          |
| Accidental extubation            | 1                   | 0            |          |
| Cerebral hemorrhage              | 1                   | 0            |          |
| Hyperkalemia                     | 1                   | 0            |          |
| Lymphopenia                      | 2                   | 1            |          |
| Neuromuscular abnormalities      | 2                   | 1            |          |
| <b>acquired in ICU</b>           |                     |              |          |
| Cardiac rythm disorder           | 2                   | 0            |          |
| Diabetes                         | 2                   | 0            |          |
| Anemia                           | 4                   | 2            |          |
| Hepatic cytolysis                | 5                   | 3            |          |
| Pulmonary embolism               | 2                   | 2            |          |
| ARDS                             | 15                  | 9            |          |
| Bacterial sepsis                 | 18                  | 4            |          |
| Fungal sepsis                    | 1                   | 0            |          |
| Neutropenia                      | 2                   | 0            |          |
| Renal failure                    | 4                   | 4            |          |
| Gastrointestinal bleeding        | 1                   | 2            |          |
| Lower limbs ischemia             | 1                   | 0            |          |
| Heart failure                    | 2                   | 0            |          |
| Complication of tracheostomy     | 0                   | 1            |          |
| Bone fracture                    | 0                   | 1            |          |
| Hypoalbuminemia                  | 0                   | 1            |          |
| Hypotension                      | 0                   | 2            |          |
| Transient ischemic attack        | 0                   | 1            |          |
| <b>Death</b>                     |                     |              |          |
|                                  | 14 (29%)            | 13 (39%)     |          |
| - Causes                         |                     |              |          |
| ARDS                             | 11                  | 7            |          |
| Bacterial sepsis                 | 0                   | 1            |          |
| Multiple organ failure           | 0                   | 5            |          |
| Cerebral hemorrhage              | 1                   | 0            |          |

|                    | <b>Sarilumab<br/>(N=48)</b> | <b>UC<br/>(N=33)</b> | <b><i>P</i></b> |
|--------------------|-----------------------------|----------------------|-----------------|
| Pulmonary embolism | 1                           | 0                    |                 |
| Heart failure      | 1                           | 0                    |                 |

\* Fisher's exact test

\*\* Poisson model



**Supplementary Figure S1 A (TOCI-2) and B (SARI-2).**

Posterior density of the risk difference and adjusted odds ratio for the day 4 outcome (golden line). The dark blue line represents the minimally informative priors. The solid gray lines indicates an RD of 0 or an OR of 1, representing no treatment effect, and the dashed gray lines indicate a moderate benefit (RD = 5.5%, OR=0.85).

**A TOCILIZUMAB**

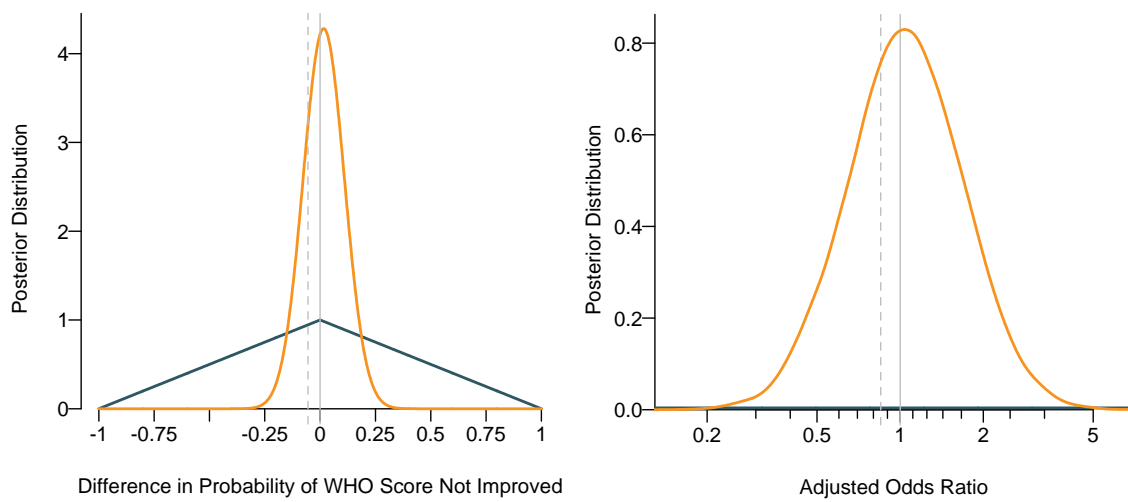

**B SARILUMAB**

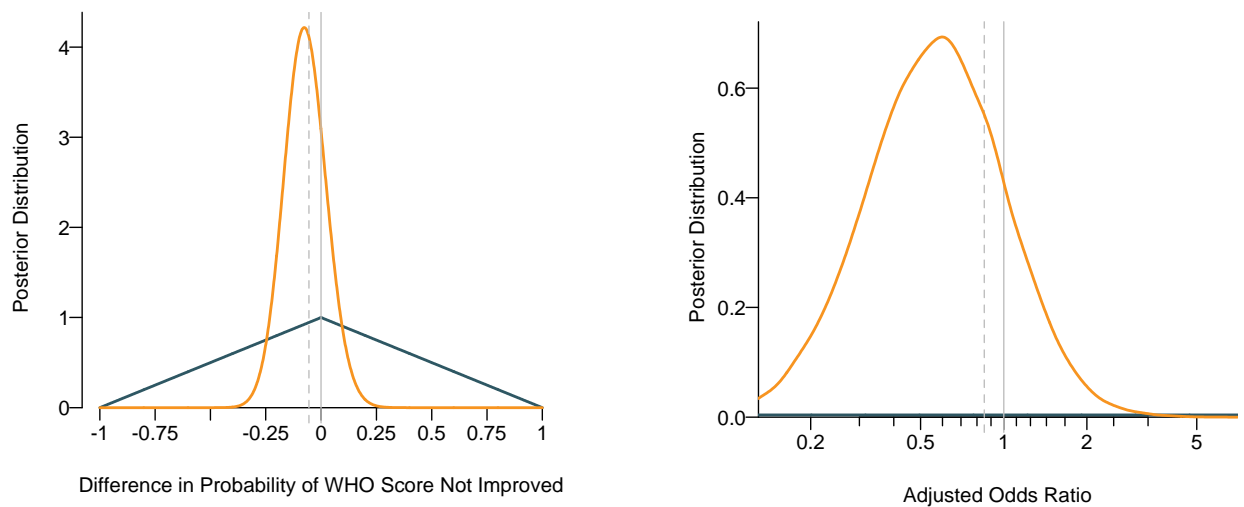

**Supplementary Figure S2 A (TOCI-2) and B (SARI-2).** Posterior density of the adjusted hazard ratio for the primary outcome (golden line). The dark blue line represents the minimally informative prior. The solid gray line indicates a HR of 1 representing no treatment effect. The dashed gray line indicates a HR of 1.18 (1/0.85) indicating a moderate benefit.

**A TOCILIZUMAB**

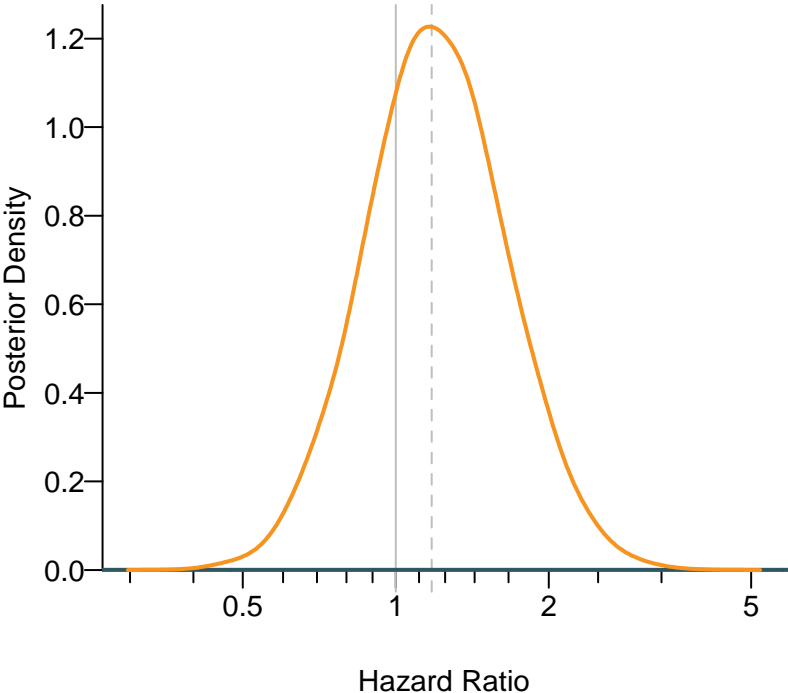

**B SARILUMAB**

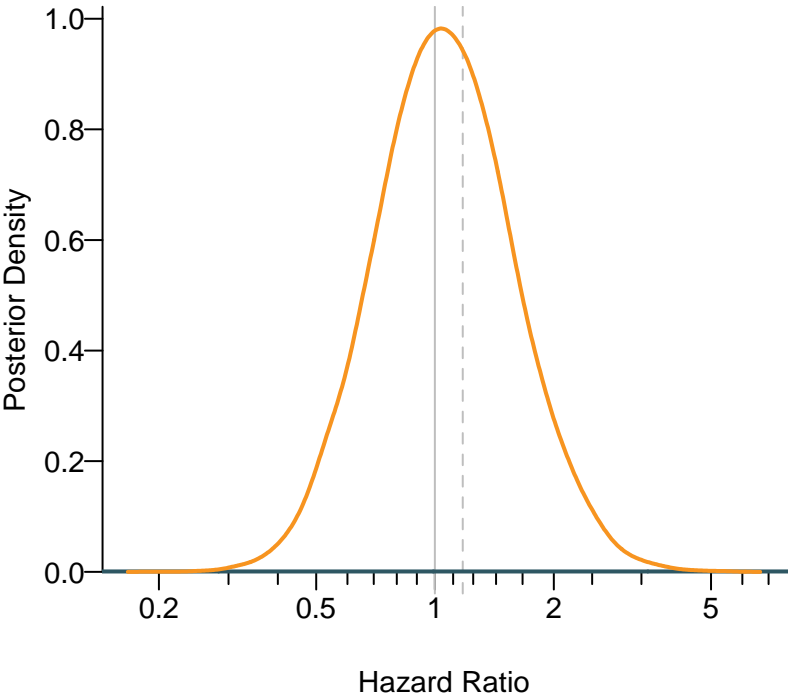

**Supplementary Figure S3. WHO score during follow-up. (TOCI-2) and B (SARI-2).**

**A TOCILIZUMAB**

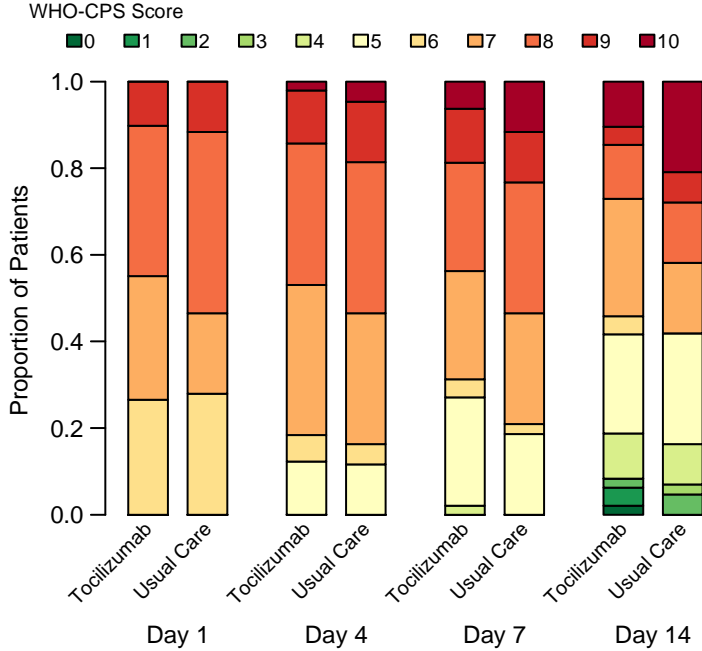

**B SARILUMAB**

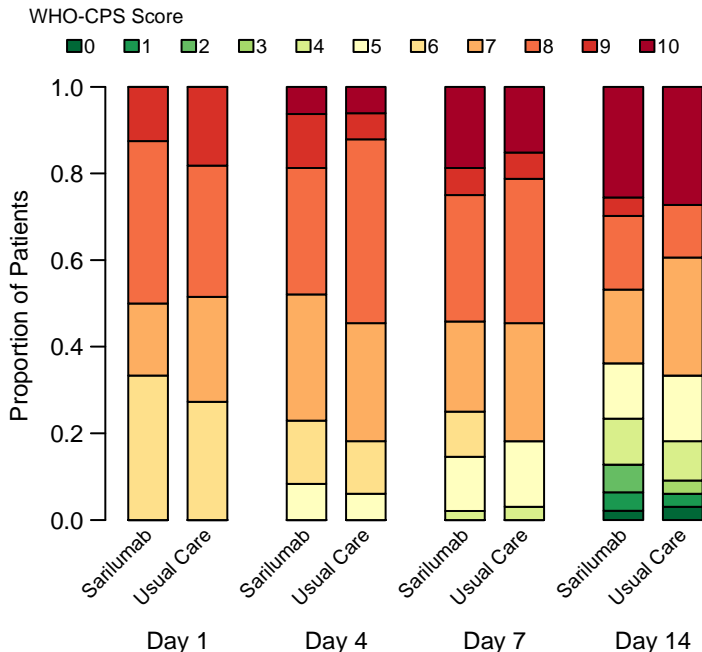

# Supplementary Figure S4. Evolution of biological parameters TOCI-2 and SARI-2 protocols

## A TOCILIZUMAB

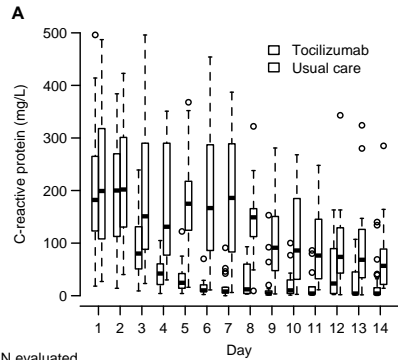

N evaluated

Tocilizumab

Usual care

45 28 38 23 18 36 21 16 24 14 13 12 12 27

33 15 25 14 15 26 13 12 16 9 12 11 16 19

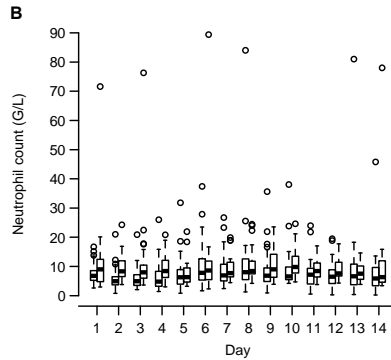

48 32 34 31 27 31 31 30 32 20 28 25 28 33

37 23 31 27 22 25 24 21 21 17 18 17 16 18

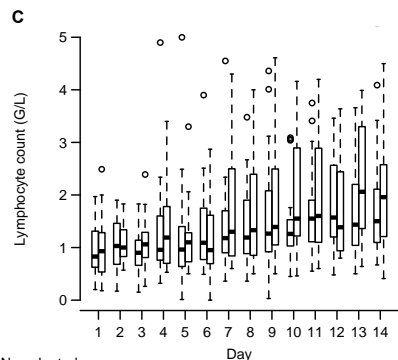

N evaluated

Tocilizumab

Usual care

48 33 33 30 25 29 28 30 17 26 23 26 31

36 21 27 25 22 24 23 20 15 17 14 14 16

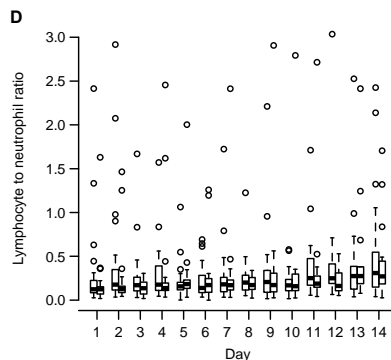

48 31 32 29 25 29 29 27 30 17 26 23 26 31

36 21 27 25 21 22 22 19 20 15 16 14 14 16

## B SARILUMAB

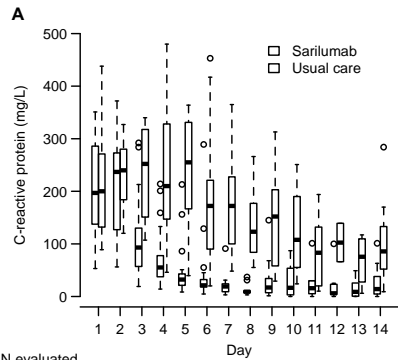

N evaluated

Sarilumab

Usual care

48 25 33 23 17 18 9 9 11 8 6 9 8 11

31 17 19 18 15 17 11 6 13 4 6 2 4 14

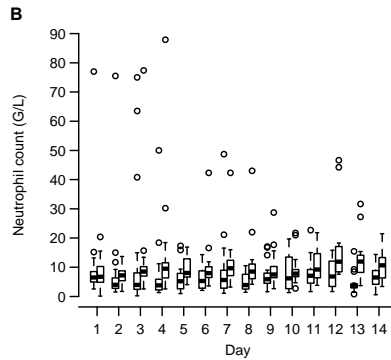

47 27 30 21 29 25 18 14 18 14 17 14 15 17

31 21 25 23 19 21 17 14 20 13 19 11 11 16

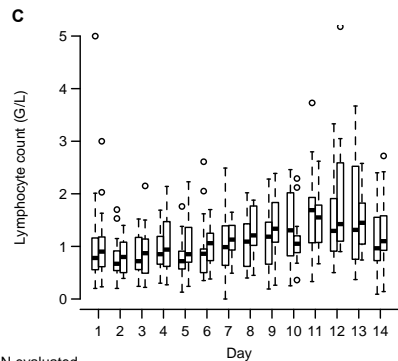

N evaluated

Sarilumab

Usual care

47 27 30 21 28 25 18 14 18 14 17 14 16 16

31 22 25 23 19 21 17 14 20 13 19 12 12 15

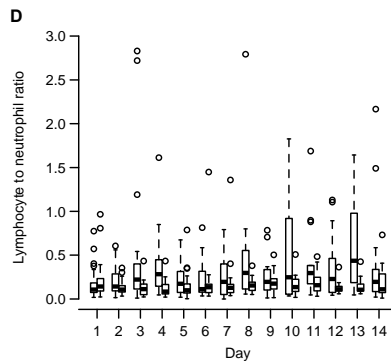

47 27 30 21 28 25 18 14 18 14 17 14 15 16

31 21 25 23 19 21 17 14 20 13 19 11 11 15

### Supplementary Figure S5

(A) Forest plot of the two-stage pooled analysis of the day 14 co-primary outcome. A HR > 1 indicates the efficacy of tocilizumab/sarilumab compared to usual care. No heterogeneity was found ( $\tau^2 = 0$ ).

(B) Forest plot of the two-stage pooled analysis of the day 90 survival outcome. A HR < 1 indicates the efficacy of tocilizumab/sarilumab compared to usual care. No heterogeneity was found ( $\tau^2 = 0$ ).

A

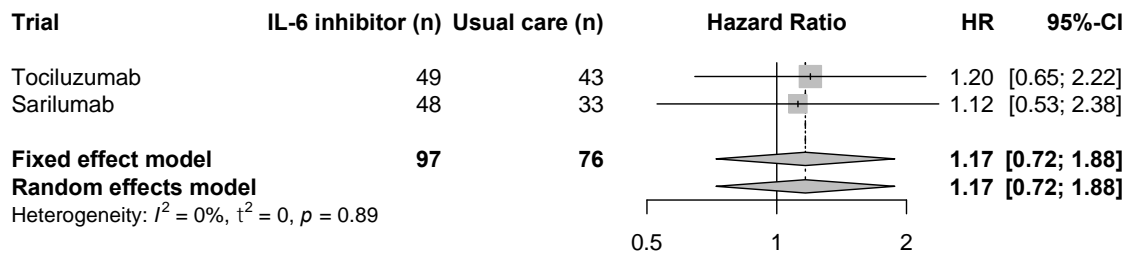

B

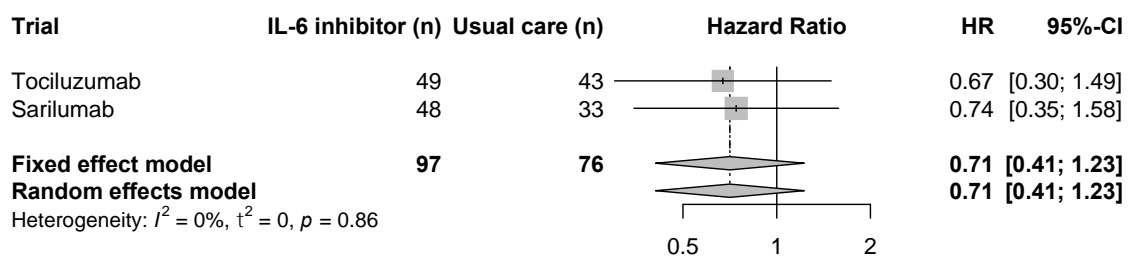

Supplement: inline-supplementary-material-1 [file inline-supplementary-material-1.pdf]
