# Supplementary material
Source: HighWire-hosted journal article supplement (https://erj.ersjournals.com/content/60/2/2102523)

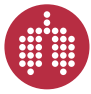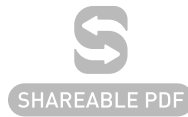

# Effect of interleukin-6 receptor antagonists in critically ill adult patients with COVID-19 pneumonia: two randomised controlled trials of the CORIMUNO-19 Collaborative Group

Olivier Hermine<sup>1,2,7</sup>, Xavier Mariette<sup>3,7</sup>, Raphael Porcher<sup>4,7</sup>, Matthieu Resche-Rigon<sup>5,7</sup>, Pierre-Louis Tharaux<sup>6,7</sup> and Philippe Ravaud<sup>4,7</sup> on behalf of the CORIMUNO-19 Collaborative Group<sup>8</sup>

<sup>1</sup>Dépt d'Hématologie, Hôpital Necker, AP-HP, Université de Paris, Paris, France. <sup>2</sup>Laboratory of Physiopathology and Treatment of Haematological Malignancies, Institut Imagine, INSERM U1153, Université de Paris, Paris, France. <sup>3</sup>Dépt de Rhumatologie, Hôpital Bicêtre, AP-HP, Université de Paris Sud, Paris, France. <sup>4</sup>Centre de Recherche Épidémiologie et Statistique Sorbonne Paris Cité (CRESS-UMR1153), INSERM/Université Paris, Centre d'Épidémiologie Clinique, Hôpital Hôtel-Dieu, Paris, France. <sup>5</sup>Service de Biostatistique et Information Médicale, INSERM U153, Hôpital Saint Louis, AP-HP, Université de Paris, Paris, France. <sup>6</sup>INSERM U970 Paris Cardiovascular Centre (PARCC), Université de Paris, Paris, France. <sup>7</sup>All authors contributed equally. <sup>8</sup>The Writing Committee is listed in the Acknowledgements section at the end of the article, and the Steering Committee and a complete list of CORIMUNO-19 investigators are provided in the supplementary appendix.

Corresponding author: Olivier Hermine ([ohermine@gmail.com](mailto:ohermine@gmail.com))

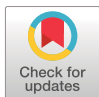

Shareable abstract (@ERSpublications)

**In two prospective randomised studies of COVID-19 patients in the ICU, anti-IL-6 receptor did not significantly increase early survival without mechanical ventilation. However, due to the small number of patients, no definitive conclusion could be drawn.** <https://bit.ly/3GoFAJV>

**Cite this article as:** Hermine O, Mariette X, Porcher R, *et al.* Effect of interleukin-6 receptor antagonists in critically ill adult patients with COVID-19 pneumonia: two randomised controlled trials of the CORIMUNO-19 Collaborative Group. *Eur Respir J* 2022; 60: 2102523 [DOI: 10.1183/13993003.02523-2021].

This single-page version can be shared freely online.

Copyright ©The authors 2022.

This version is distributed under the terms of the Creative Commons Attribution Non-Commercial Licence 4.0. For commercial reproduction rights and permissions contact [permissions@ersnet.org](mailto:permissions@ersnet.org)

Received: 25 June 2021  
Accepted: 23 Dec 2021

## Abstract

**Background** Our objective was to determine whether anti-interleukin (IL)-6 receptors improve outcomes of critically ill patients with coronavirus disease 2019 (COVID-19) pneumonia. We report on two cohort-embedded, investigator-initiated, multicentre, open-label, Bayesian randomised controlled clinical trials.

**Methods** Patients were randomly assigned to receive either usual care (UC) or UC+tocilizumab (TCZ) 8 mg·kg<sup>-1</sup> (TOCI-2 trial) or UC or UC+sarilumab (SARI) 200 mg (SARI-2 trial), both intravenously on day 1 and, if clinically indicated, on day 3.

**Results** Between 31 March and 20 April 2020, 97 patients were randomised in the TOCI-2 trial, to receive UC (n=46) or UC+TCZ (n=51). At day 14, numbers of patients who did not need noninvasive ventilation (NIV) or mechanical ventilation (MV) and were alive with TCZ or UC were similar (47% *versus* 42%; median posterior hazard ratio (HR) 1.19, 90% credible interval (CrI) 0.71–2.04), with a posterior probability of HR >1 of 71.4%. Between 27 March and 4 April 2020, 91 patients were randomised in the SARI-2 trial, to receive UC (n=41) or UC+SARI (n=50). At day 14, numbers of patients who did not need NIV or MV and were alive with SARI or UC were similar (38% *versus* 33%; median posterior HR 1.05, 90% CrI 0.55–2.07), with a posterior probability of HR >1 of 54.9%. Overall, the risk of death up to day 90 was: UC+TCZ 24% *versus* UC 30% (HR 0.67, 95% CI 0.30–1.49) and UC+SARI 29% *versus* UC 39% (HR 0.74, 95% CI 0.35–1.58). Both TCZ and SARI increased serious infectious events.

**Conclusion** In critically ill patients with COVID-19, anti-IL-6 receptors did not significantly increase the number of patients alive without any NIV or MV by day 14.

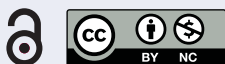

Supplement: inline-supplementary-material-4 [file inline-supplementary-material-4.pdf]
