# Supplementary material
Source: HighWire-hosted journal article supplement (https://erj.ersjournals.com/content/60/2/2102523)
Supplement: inline-supplementary-material-2 [file inline-supplementary-material-2.pdf]

**Supplementary Appendix (Authors list)**

**Effect of Interleukin-6 Receptor Antagonists in Critically Ill Adult Patients with COVID-19 Pneumonia: two Randomized Controlled Trials**

## **CORIMUNO-19 Collaborative Group\***

\*All these people are registered as collaborators

### **Writing Committee**

Olivier Hermine\*, Xavier Mariette\*, Pierre-Louis Tharaux\*, Matthieu Resche-Rigon\*, Raphaël Porcher\*, Philippe Ravaud\*

\* equal contribution

### **Steering Committee**

Philippe Ravaud (chair of the CORIMUNO-19 platform), Serge Bureau, Maxime Dougados, Olivier Hermine, Xavier Mariette, Matthieu Resche-Rigon, Pierre-Louis Tharaux, Annick Tibi

### **Scientific Committee**

Olivier Hermine (chair), Elie Azoulay, Serge Bureau, Jacques Cadranel, Maxime Dougados, Joseph Emmerich, Muriel Fartoukh, Bertrand Guidet, Marc Humbert, Karine Lacombe, Matthieu Mahevas, Xavier Mariette, Frédéric Pene, Raphaël Porcher, Valérie Pourchet-Martinez, Philippe Ravaud, Matthieu Resche-Rigon, Frédéric Schlemmer, Pierre-Louis Tharaux, Annick Tibi, Yazdan Yazdanpanah

### **Methodology and statistics**

*Methodology:* Philippe Ravaud

*Statistics:* Raphaël Porcher (statistics lead), Gabriel Baron, Elodie Perrodeau (internal independent statistician)

### **Data Monitoring Committee-1**

DSMB1 resigned because of differences between the investigators and sponsors and the DSMB with regard to the management of the protocol and the communication of the results. No issues of subject safety or data integrity were raised.

AP-HP, as sponsor of the study, and investigators accepted the resignation of the initial DSMB1 on April 30, 2020 and appointed a new DMC on May 1, 2020, which was approved by the Agence Nationale de Sécurité du Médicament et des Produits de Santé (ANSM) on May 3, 2020.

### **Data Monitoring Committee-2**

Deepak L Bhatt (Chair), Sandro Galea, Frank Harrell, Cristina Mussini, Kevin Winthrop, Patrick Yeni

\* The first meeting of Data Monitoring Committee 2 was held on May 9, 2020

### **CORIMUNO-19 Central Coordinating Office: DRCI – AP-HP**

*Responsible for the sponsor:* Serge Bureau

Damien Vanhoye, Cécile Kedzia, Lauren Demerville, Anne Gysembergh-Houal, Alexandre Bourgoin,

**CORIMUNO-19 platform trials Coordinating Office:** DRCI – Unités de Recherche Clinique Lariboisière / Fernand Widal / Saint Louis, AP-HP

*Clinical Trial Unit Lead:* Matthieu Resche-Rigon

*Clinical Trial Unit Manager:* Nabil Raked, Lakhdar Mameri,

*Clinical Trial Unit team:* Claire Montlahuc, Lucie Biard, Stéphanie Alary, Samir Hamiria, Thinhinane Bariz, Hala Semri, Dhiaa Meriem Hai, Moustafa Benafla, Mohamed Belloul, Pernelle Vauboin, Saskia Flamand, Claire Pacheco, Anouk Walter-Petrich, Emilia Stan, Souad Benarab, Corine Nyanou

*Trial logistics support :* Maxime Dougados, Université de Paris, Hôpital Cochin, AP-HP

### **Drug supply: AGEPS – AP-HP**

*Pharmacy lead:* Annick Tibi

Robin Charreteur, Céline Dupre, Kévin Cardet, Blandine Lehmann, Kamil Baghli

**REACTing Consortium** (Coordination between AP-HP, Inserm and Universities)

*Chair:* Yazdan Yazdanpanah

Claire Madelaine, Eric D'Ortenzio, Oriane Puéchal, Caroline Semaille

### **The 6 Local clinical centres of CORIMUNO-19 trials having participated to CORIMUNO-TOCI-2 and SARI-2.**

Bicêtre, AP-HP - Cochin AP-HP – HEGP, AP-HP - Henri Mondor, AP-HP – Lariboisière, AP-HP - Saint Antoine, AP-HP

**Local clinical centres of CORIMUNO-19 trials staff** (listed in order of the number of patients randomized per site in the totality of CORIMUNO-19 trials)

**AP-HP, Hôpital Bicêtre, Université Paris-Saclay**

**PI:** Xavier Mariette, **Co-Pi:** Laurent Savale

**Investigators :** Anatole Harrois, Samy Figueiredo, Jacques Duranteau, Nadia Anguel, Arthur Pavot, Xavier Monnet, Christian Richard, Jean-Louis Teboul, Philippe Durand, Pierre Tissieres, Mitja Jevnikar, Marc Humbert, David Montani, Stephan Pavy, Nicolas Noel, Olivier Lambotte, Lelia Escaut, Stephane Jauréguiberry, Elodie Baudry, Christiane Verny, Edouard Lefevre, Mohamad Zaidan

**Local Clinical Research unit:** Domitille Molinari, Gaël Leprun, Alain Fourreau, Laurent Cylly, Lamiae Grimaldi

**Local Clinical Research team:** Myriam Virlovet, Ramdane Meftali, Solène Fabre, Marion Licois, Asmaa Mamoune, Yacine Boudali

**Pharmacy:** Clotilde Le Tiec

**Biological resource centre:** Céline Verstuyft, Anne-Marie Roques

**AP-HP, Hôpital Tenon, Université Paris-Sorbonne**

**PI:** Sophie Georjin-Lavialle, **Co-Pi:** Jacques Cadranet

**Investigators :** Patricia Senet, Gilles Pialoux, Angèle Soria, Antoine Parrot, Hélène François, Nathalie Rozensztajn, Emmanuelle Blin, Pascaline Choinier, Juliette Camuset, Jean-Simon Rech, Antony Canellas, Camille Rolland-Debord, Nadège Lemarié, Nicolas Belaube, Marine Nadal, Martin Siguier, Camille Petit-Hoang, Julie Chas, Muriel Fartoukh.

**Local Clinical Research unit :** Elodie Drouet, Matthieu Lemoine, Audrey Phibel, Lucie Aunay, Eliane Bertrand, Sylviane Ravato, Marie Vayssettes, Anne Adda, Celine Wilpote, Pélagie Thibaut

**Pharmacy :** Julie Fillon, Isabelle Debrix

**Biological resource centre:** Soraya Fellahi, Jean-Philippe Bastard, Guillaume Lefèvre

**Hôpitaux Universitaires de Strasbourg, Université de Strasbourg**

**Co-PIs:** Jacques-Eric Gottenberg and Yves Hansmann

**Investigators:** Frédéric Blanc, Sophie Ohlmann-Caillard, Vincent Castelain, Emmanuel Chatelus, Eva Chatron, Olivier Collange, François Danion, Frédéric De Blay, Pierre Diemunsch, Sophie Diemunsch, Renaud Felten, Bernard Goichot, Valentin Greigert, Aurelien Guffroy, Bob Heger, Charlotte Kaeuffer, Loic Kassegne, Anne Sophie Korganow, Pierrick Le Borgne, Nicolas Lefebvre, Paul-Michel Mertes, Eric Noll, Mathieu Oberlin, Vincent Poindron, Julien Pottecher, Yvon Ruch, François Weill

**Local Clinical Research unit:** Nicolas Meyer, Emmanuel Andres, Eric Demonsant, Hakim Tayebi, Gabriel Nisand, Stéphane Brin, Cédric Sublon

**Pharmacy :** Guillaume Becker, Anne Hutt, Tristan Martin

**Biological Resource Centre:** Sophie Bayer, Catherine Metzger

**AP-HP, Hôpital Saint-Antoine, Université Paris-Sorbonne**

**PI:** Arsene Mekinian, **Co-PI:** Karine Lacombe, Bertrand Guidet

**Investigators:** Noémie Abisoror, Amir Adedjouma, Diane Bollens, Marion Bonneton, Nathalie Bourcicaux, Anne Bourrier, Maria Chauchard Thibault Chiarabiani, Dorothee Chopin, Jonathan Cohen, Ines Devred, Bruno Donadille, Olivier Fain, Geoffrey Hariri, Vincent Jachiet, Patrick Ingliz, Marc Garnier, Marc Gatfosse, Etienne Ghrenassia, Delphine Gobert, Bertrand Guidet, Jessica Krause le Garrec, Cecilia Landman, Jean Remy Lavillegrand, Benedicte Lefebvre, Thibault Mahevas, Sandie Mazerand, Jean Luc Meynard, Marjolaine Morgand, Zineb Ouazène, Jerome Pacanowski, Sébastien Riviere, Philippe Seksik, Harry Sokol, Heithem Soliman, Nadia Valin, Thomas Urbina

**Local Clinical Research unit:** Chloé McAvoy, Maria Pereira Miranda, Gladys Aratus, Laurence Berard, Tabassome Simon,

**Pharmacy :** Anne Dagueneel Nguyen, Elise Girault, Clémentine Mayala-Kanda, Marie Antignac, Céline Leplay

**Biological resource centre:** Gladys Aratus, Laurence Berard, Tabassome Simon

**AP-HP, Hôpital Européen Georges Pompidou, Université de Paris,**

**PI:** Jean-Benoit Arlet, **Co-Pi:** Jean-Luc Diehl

**Investigators :** Florence Bellenfant, Anne Blanchard, Alexandre Buffet, Bernard Cholley, Antoine Fayol, Edouard Flamarion, Anne Godier, Thomas Gorget, Sophie-Rym Hamada, Caroline Hauw-Berlemont, Jean-Sébastien Hulot, David Lebeaux, Marine Livrozet, Adrien Michon, Arthur Neuschwander, Marie-Aude Pennet, Benjamin Planquette, Brigitte Ranque, Olivier Sanchez, Geoffroy Volle

**Local Clinical Research unit** : Sandrine Briois, Mathias Cornic, Virginie Elisee, Jesuthasan Denis, Juliette Djadi-Prat, Pauline Jouany, Ramon Junquera, Mickael Henriques, Amina Kebir, Isabelle Lehir, Jeanne Meunier, Florence Patin, Valérie Paquet, Anne Tréhan, Véronique Vigna

**Pharmacy** : Brigitte Sabatier

**Biological resource centre, Clinical Investigation Centre, PARCC, Inserm**: Damien Bergerot, Charlène Jouve, Camille Knosp, Olivia Lenoir, Nassim Mahtal, Léa Resmini.

#### **AP-HP, Hôpital Bichat, Université de Paris**

**PI**: Xavier Lescure, **Co-PI**: Jade Ghosn

**Investigators**: Antoine Bachelard, Anne Rachline, Valentina Isernia, Bao-chau, Phung, Dorothée Vallois, Aurelie Sautereau, Catherine Neukrich, Antoine Dossier, Raphaël Borie, Bruno Crestani, Gregory Ducrocq Philippe Gabriel Steg, Philippe Dieude, Thomas Papo

**Local Clinical Research unit**: Estelle Marcault, Marhaba Chaudhry, Charlène Da Silveira, Annabelle Metois, Ismahan Mahenni, Meriam Meziani, Cyndie Nilusmas

**Local Clinical Research team**: Sylvie Le Gac, Awa Ndiaye, Françoise Louni, Malikhone Chansombat, Zelie Julia, Solaya Chalal, Lynda Chalal

**Pharmacy**: Laura Kramer, Jeniffer Le Grand

**Biological resource centre**: Kafif Ouifiya, Valentine Piquard, Sarah Tubiana

#### **AP-HP, Hôpital Beaujon, Université de Paris**

**PI**: Yann Nguyen

**Investigators**: Vasco Honsel, Emmanuel Weiss, Anaïs Codorniu, Virginie Zarrouk, Victoire de Lastours, Matthieu Uzzan

**Local Clinical Research unit**: Naura Gamany, Agathe Claveirole, Alexandre Navid, Tiffanie Fouque, Yonathan Cohen, Maya Lupo, Constance Gilles, Roza Rahli

**Pharmacy**: Zeina Louis

#### **AP-HP, Hôpital Saint-Louis, Université de Paris**

**PI**: David Boutboul, **Co-PI**: Lionel Galicier, Elie Azoulay

**Investigators** : Lionel Galicier, Yaël Amara, Gabrielle Archer, Elie Azoulay, Amira Benattia, Anne Bergeron, Louise Bondeelle, Nathalie de Castro, Melissa Clément, Michaël Darmon, Blandine Denis, Clairelyne Dupin, Elsa Feredj, Delphine Feyeux, Adrien Joseph, Etienne Lengliné, Pierre Le Guen, Geoffroy Liégeon, Gwenaël Lorillon, Asma Mabrouki, Eric Mariotte, Grégoire Martin de Frémont, Adrien Mirouse, Jean-Michel Molina, Régis Peffault de Latour, Eric Oksenhendler, Julien Saussereau, Abdellatif Tazi, Jean-Jacques Tudesq, Lara Zafrani

**Local Clinical Research team**: Isabelle Brindele, Emmanuelle Bugnet

Karine Celli Lebras, Julien Chabert, Lamia Djaghout, Catherine Fauvaux

Anne Lise Jegu, Ewa Kozakiewicz, Martine Meunier, Marie-Thérèse Tremorin

**Pharmacy**: Claire Davoine, Isabelle Madelaine

**Biological resource centre**: Sophie Caillat-Zucman, Constance Delaugerre, Florence Morin

#### **AP-HP, Hôpital Lariboisière, Université de Paris**

**PI**: Damien Sène

**Investigators** : Ruxandra Burlacu, Benjamin Chousterman, Bruno Mégarbanne, Pascal Richette, Jean-Pierre Riveline, Aline Frazier

**Local Clinical Research unit** : Eric Vicaut, Laure Berton, Tassadit Hadjam, Miguel Alejandro Vazquez-Ibarra, Clément Jourdain, Olivia Tran, Véronique Jouis

**Pharmacy** : Aude Jacob, Julie Smati, Stéphane Renaud

**Biological resource centre**: Claire Pernin, Lydia Suarez

#### **AP-HP, Hôpital Avicenne, Université Paris-Nord Sorbonne**

**PI**: Luca Semerano

**Investigators** : Sébastien Abad, Ruben Bénainous, Nicolas Bonnet, Celine Comparon, Yves Cohen, Hugues Cordel, Robin Dhote, Nathalie Dournon, Boris Duchemann, Nathan Ebstein, Thomas Gille, Benedicte Giroux-Leprieur, Jeanne Goupil de Bouille, Hilario Nunes, Johanna Oziel, Dominique Roulot, Lucile Sese, Claire Tantet, Yurdagul Uzunhan.

**Local Clinical Research Unit**: Coralie Bloch-Queyrat, Vincent Levy, Fadhila Messani, Mohammed Rahaoui, Mylène Petit.

**Pharmacy**: Sabrina Brahmi, Vanessa Rathoin, Marthe Rigal

**AP-HP, Hôpital Cochin, Université de Paris**

**PI:** Nathalie Costedoat-Chalumeau **Co-PI:** Liem Binh Luong, Frédéric Pene

**Investigators:** Zakaria Ait Hamou, Sarah Benganem, Philippe Blanche, Nicolas Carlier, Benjamin Chaigne, Remy Gauzit, Hassan Joumaa, Mathieu Jozwiak, Marie Lachâtre, Hélène Lafoeste, Odie Launay, Paul Legendre, Jonathan Marey, Caroline Morbieu, Lola-Jade Palmieri, Tali-Anne Szwebel

**Local Clinical Research unit:** Hendy Abdoul, Alexandra Bruneau, Audrey Beclin-Clabaux, Charly Larrieu, Pierre Montanari, Eric Dufour

**Local Clinical Research team:** Ada Clarke, Catherine Le Boulout, Nathalie Marin, Nathalie Menage, Samira Saleh-Mghir, Mamadou Salif Cisse, Kahina Cheref

**Pharmacy:** Corinne Guerin, Jérémie Zerbit

**AP-HP, Hôpital Henri Mondor, Université Paris-Est Créteil**

**PI:** Marc Michel

**Investigators:** Sébastien Gallien, Etienne Crickx, Benjamin Le Vasseur, Emmanuelle Kempf, Karim Jaffal, William Vindrios, Julie Oniszczuk, Marc Michel, Matthieu Mahevas, Constance Guillaud, Frédéric Schlemmer, Pascal Lim, Elena Foïs, Giovanna Melica, Marie Matignon, Maud Jalabert, Jean-Daniel Lelièvre

**Local Clinical Research unit:** David Schmitz, Marion Bourhis, Syla Belazouz, Laetitia Languille, Caroline Boucle, Nelly Cita, Agnès Didier, Fahem Froua, Katia Ledudal, Thiziri Sadaoui, Armand Mekontso Dessap

**Pharmacy:** Alaki Thiemele, Delphine Le Febvre De Bailly, Muriel Carvalho Verlinde

**AP-HP, Hôpital de la Pitié-Salpêtrière, Université Paris-Sorbonne**

**PI:** Julien Mayaux, **Co-PI:** Patrice Cacoub

**Investigators :** David Saadoun, Mathieu Vautier, Hélène Bugaut, Olivier Benveniste, Yves Allenbach, Gaëlle Leroux, Aude Rigolet, Perrine Guillaume-Jugnot, Fanny Domont, Anne Claire Desbois, Chloé Comarmond, Nicolas Champiaux, Segolene Toquet, Amine Ghembaza, Matheus Vieira, Georgina Maalouf, Gonçalo Boleto, Yasmina Ferfar, Jean-Christophe Corvol, Céline Louapre, Sara Sambin, Louise-Laure Mariani, Carine Karachi

**Local Clinical Research unit :** Florence Tubach, Candice Estellat, Linda Gimeno, Karine Martin, Aïcha Bah, Vixra Keo, Sabine Ouamri, Yasmine Messaoudi, Nessima Yelles, Pierre Faye

**Local Clinical Research team:**, Sebastien Cavelot, Cecile Larcheveque, Laurence Annonay, Jaouad Benhida, Aïda Zahrate-Ghoul, Soumeya Hammal, Ridha Belilita,

**Pharmacy:** Fanny Charbonnier

**AP-HP, Hôpital Necker Enfants Malades, Université de Paris**

**PI:** Claire Aguilar

**Investigators :** Fanny Alby-Laurent, Carole Burger, Clara Campos-Vega, Nathalie Chavarot, Benjamin Fournier, Claire Rouzaud, Damien Vimpère, Jean Herlé, Lionel Lhamaut.

**Local Clinical Research unit:** Caroline Elie, Prissile Bakouboula, Laure Choupeaux, Sophie Granville, Elodie Issorat

**Pharmacy:** Christine Broissand

**Biological resource centre:** Marie-Alexandra Alyanakian

**AP-HP, Hôpital Ambroise Paré, Université Paris-Saclay**

**PI:** Guillaume Geri

**Local Clinical Research unit:** Nawal Derridj, Naima Sguiouar, Hakim Meddah, Mourad Djadel

**Pharmacy:** Hélène Chambrin-Lauvray

**AP-HP, Hôpital Paul Brousse, Université Paris-Saclay**

**PI:** Jean-Charles Duclos-vallée, **Co-PI:** Faouzi Saliba,

**Investigators:** Sophie-Caroline Sacleux, Ilias Kounis

**Local Clinical Research unit:** Sonia Tamazirt

**Pharmacy:** Eric Rudant

**Institut Gustave Roussy, Université Paris-Saclay**

**PI:** Jean-Marie Michot

**Investigators:** Annabelle Stoclin, Emeline Colomba, Fanny Pommeret, Christophe Willekens

**Local Clinical Research unit:** Rosa Da Silva, Valérie Dejean, Yasmina Mekid, Ines Ben-Mabrouk

**Pharmacy:** Florence Netzer

**Biological resource centre:** Caroline Pradon, Laurence Drouard, Valérie Camara-Clayette

**Hôpital Privé d'Antony**

**PI:** Alexandre Morel,  
**Investigators:** Gilles Garcia, Abolfazl Mohebbi  
**Local Clinical Research unit:** Ferial Berbour, Mélanie Dehais,  
**Pharmacy:** Anne-Lise Pouliquen, Alison Klasen, Loren Soyeze-Herkert

**Groupe Hospitalier Diaconesse Croix Saint-Simon**

**PI:** Jonathan London  
**Investigators:** Jonathan London  
**Local Clinical Research unit:** Younes Keroumi  
**Pharmacy:** Emmanuelle Guillot

**Hôpital de Valenciennes**

**PI:** Guillaume Grailles  
**Investigators:** Younes El amine, Fanny Defrancq  
**Local Clinical Research unit:** Hanane Fodil, Chaouki Bouras  
**Pharmacy:** Dominique Dautel

**Hôpital Delafontaine de Saint Denis**

**PI:** Nicolas Gambier  
**Pharmacy:** Thierno Dieye

**Hôpital Marseille - Hôpital Saint Joseph**

**PI:** Boris Bienvenu  
**Investigators:** Victor Lancon  
**Local Clinical Research unit:** Laurence Lecomte, Kristina Beziriganyan, Belkacem Asselate  
**Pharmacy:** Laure Allanic, Elena Kiouris, Marie-Hélène Legros, Christine Lemagner, Pascal Martel, Vincent Provitolo

**Hôpital Foch- Suresnes**

**PI:** Félix Ackermann  
**Local Clinical Research unit:** Mathilde Le Marchand  
**Pharmacy:** Aurélie Chan Hew Wai, Dimitri Fremont

**CHU de Clermont-Ferrand - Gabriel Montpied**

**PI:** Elisabeth Coupeze  
**Local Clinical Research unit:** Mireille Adda, Frédéric Duée  
**Pharmacy:** Lise Bernard

**CH André Mignot-Versailles**

**PI:** Antoine Gros  
**Local Clinical Research Unit:** Estelle Henry  
**Pharmacy:** Claire Courtin, Anne Pattyn

**CHU Dijon –Bourgone**

**PI:** Pierre-Grégoire Guinot  
**Local Clinical Research unit:** Marc Bardou, Agnes Maurer  
**Pharmacy:** Julie Jambon, Amélie Cransac, Corinne Pernot

**Hôpital Robert Debré – Reims**

**PI:** Bruno Mourvillier  
**Local Clinical Research Unit:** Eric Marquis  
**Pharmacy:** Philippe Benoit

**AP-HP – Hôpital Louis Mourier**

**PI:** Damien Roux  
**Local Clinical Research unit:** Coralie Gernez

**Hôpital Claude Huriez - Lille**

**PI:** Cécile Yelnik, **Co-PI:** Julien Poissy  
**Local Clinical Research unit:** Mandy Nizard

*Pharmacy:* Fanette Denies

**Centre Hospitalier Robert Ballanger - Aulnay-sous-Bois**

*PI:* Helene Gros

**GH Paris Saint Joseph**

*PI:* Jean-Jacques Mourad

*Local Clinical Research unit:* Emmanuelle Sacco

*Pharmacy:* Sophie Renet

## **Acknowledgements**

We thank for their support people having participated to the study by different aspects

### **CORIMUNO-19 Central Coordinating Office: DRCI – AP-HP**

*Officers from DRCI:* Coralie Villeret, Joséphine Braun, Didier Bouton, Riad Baameur, Emmanuelle Liegey, Amel Ouslimani, Isabelle Vivaldo, Zouleikha Bentoumi, Hélène Brocvielle, Florent Viguier, Katya Touat, Céline Le Galludec, Stephany Pong, Jeremy Combet, Aymen Rabai, Sana Bouriche, Yousra Labidi, Sofiane Mokrani, Valentin Hosansky, René Bun, Ferhat Chikhi, Sofya Mortaki, Laure Plat, Nesine Mechouar, Toufik Taib, Priscilla Andriamiandrisoa, Anne Noah, Julie Tequi-Lebras, Christine Figuerola, Sabrina Leveau

### **Local clinical centers CORIMUNO-19 trials staff**

#### **AP-HP, Hôpital Bicêtre University Hospital and Université Paris-Saclay**

*Clinicians having taken care of patients:* Jean-Louis Teboul, Laurent Guerin, Astrid Bertier, Soufia Ayed, Arthur Pavot, Thibault Creutin, Tai Pham, Frédéric Desmoulins, Matthieu Guillet, Manon Dekeyser, Olivier Sitbon, Etienne Marie Jutant, David Montani, Xavier Jais, Jérémie Pichon, Athenais Boucly, Sophie Bulifon, Andrei Seferian, Antoine Beurnier, Florence Parent, Roseline D’Oiron, Antoine Cheret, Jeremy Gottlieb, Jérémie Benichou, Alexandre Dormoy, Céline Labeyrie, Julien Henry, Alexandre Virone

*Clinical Research technicians, clinical research doctors and students:* Myriam Virlouvet & Solène Fabre (Gynaecology-obstetrics dpt), Yacine Boudali, Sylvie Miconnet (Rheumatology dpt), Marie-Thérèse Legaud (Nephrology dpt), Jugurtha Berkenou (Plateforme Maladies Rares), Anne Brel, Andreea Catina, Céline Chevreau, Jodie Ferrand, Marie Galopeau, Noémie Monard, Clémence Roche, Cypria Siva, Béatrice Vest, Kévin Hakkakian, Peter Chen, Lucile Durand, Jeremie Robinsohn, Yohann Cauche, Simon Rigaux, Léa Delarue, Claire Carles, Céline Koeberle, Baptiste Desjardins, Thomas Boesch, Nicolas Leroux, Pauline Potisek, Christian Luna, Khalis Sarah, Chabbert Jérôme, Bourdin Joachim, Lola Othily, Constans Fanny, Rosalie Brabant, Nassim Benaissa, Alexandre Khuu, Ariane Guillaume, Neslon Drogue Gomes, Djilali Batouche, Clémence Mille, Camille Hostachy Arnaud Peramo, Marc Labetoulle, Antoine Rousseau

#### **AP-HP, Hôpital Tenon and Université Paris-Sorbonne**

*Clinicians having taken care of patients:* Vincent Fallet, Ludovic Lassel, Gilles Grateau, Gilles Pialoux, Eric Bouvard, François Lionnet, Sarah Mattioni, Claude Bachmeyer, Aline Santin, Muriel Fartoukh, Guillaume Voiriot, Michel Djibré, Sophie Le Nagat, Julie Chas, Martin Siguier, Léa Savey, Olivier Steichen, Elzbieta Garandeau, Hélène Goulet, Lise Matton, Pierre Rigaud, Enora Berti, Clarisse Blayau, Alexandre Elabbadi, Aude Gibelin, Julien Lopinto, Paris Meng, Matthieu Turpin.

*Clinical Research technicians, clinical research doctors, students:* Cora Lucet, Jean-Edouard Martin, Kaïna Mahmoudi, Sara E Sa, Aude Dos Santos, Marine Moreau, Tamazouzt Ribert, Céline Wilpote, Marie Prades-Borio, Nathalie Sermondade.

#### **Hôpitaux de Strasbourg and Université de Strasbourg**

*Clinicians having taken care of patients:* Lydia Calabrese, Maxence Meyer, Carmen Suna

*Clinical Research technicians* Lamia Amoura, Khaled Benneddif, Marjory Berns, Anne Botzung, Thouma-La Chanthavinout, Stéphane Hecketsweiler, Joël Herrmann, Fanny Huselstein, Luz Marc, Corine Martin, Jessica Parthonneau, Lucie Rauch, Nathalie Reinbold, Arnaud Romoli, Danielle Roy, Elisabeth Vergne, Yazhuo Gong, Sara Zgheib

#### **AP-HP, Hôpital Saint-Antoine and Université Paris Sorbonne**

*Clinicians having taken care of patients:* Ingrid Reinhart, Olivia Pietri et Marie Lequoy, Philippe Nuss, Eric Maury, Hafid Ait Oufella, Abelkrim Abdelmalek, Laurent Beaugerie, Armelle Poujol, Nicolas Carbonnel, Lionel Arrivé, Clément Cholet, Laurence Monnier Cholley, Franck Boccara, Ariel Cohen, Sarou Adavane, Alice Courties, Sonia Alamowitch, Edouard Januel, Jean Capron, Marion Yger, Fabienne Fieux, Jean Luc Baudel, Dominique Pateron, Jennifer Sobotka, Pierre Alexis Raynal, Olivier Cha, Eda Bui, Murielle Chaillet, Christelle Hermand, Helene Vallet, Valery Bellamy, Laura Moisi, Caroline Thomas, Emmanuel Pardo, Lucie Darrivière, Laure Bottin

*Clinical Research technicians and students:* Cyrielle Letaillandier, Manuela LeCam, Christian Tran, Jean-Luc Lagneau, Julie Lamarque

#### **AP-HP, Hôpital Européen Georges Pompidou and Université de Paris**

*Clinicians having taken care of patients:* Sébastien Clerc, Elsa Denoix, Thomas Gorget, Jean Pastre, Marie-Aude Penet, Jérôme Pinot, Claire Potencier, Matthieu Le Melledo, Amer Hamdan



**Biology platform:** Eric Tartour, Marie-Agnès Dragon-Durey, Franck Pages, Véronique Frémeaux-Bacchi, Stéphanie Baron

**Clinical Research technicians and students:** Assya AKLI, Shahnaze AQIL, Leslie Benattar, Sérine Chaïbi ; Louise Chantelot ; Valentin Demeure, Anna Dordonnat, Marin Durand, Alexandre Ifrah, Camille Lavril, Anouk Giulianelli, Alexandre Mary, Salomé Oliviera, Xavier Pinus, Pierre Poujard, Marguerite Requillard, Anouchka Ron, Matéo Sanchis-Borja ; Adèle Sandot ; Gabrielle Stevenin, Heloise Wauquiez

#### **AP-HP, Hôpital Bichat and Université de Paris**

Véronique Joly, Sylvie Lariven, Christophe Rioux, Diane Le Pluart, Laurence Deconinck, Sophie Ismael, Marie Gilbert, Anne Gervais Hassan Tharini, Agathe Bounhiol, Mayda Al Rahi, Bérénice Souhail, Maya Husain, François Maillat thomas Volpe Simon Gressens, Aanabelle Pourbaix, Marion Parisey, Marie Dubert, Timothée Bironne Cloé De Broucker

Simon Valayer, Jeanne Chauffier, Catherine Boussard, Axelle Fuentes, Paul Crespin, Jonathan Vermes

#### **AP-HP, Hôpital Beaujon and Université de Paris**

**Clinicians having taken care of patients:** Paer-Selim Abback, Mathieu Battelier, Marion Bedbeder, Hélène Bout, Marine Cazaux, Pierre-Marie Choinier, Félix Corre, Sonja Curac, Clémentine De La Porte Des Vaux, Louis De Mestier Du Bourg, Paul de Saint, Marco Dioguardi Burgio, Fatou Drame, Bruno Fantin, Adrien Galy, Hélène Gout, Jules Gregory, Marion Guillouet, Antoine Hamon, Gueorgui Iakovlev, Linda Khoy-Ear, Sophie Lacaille, Amandine Landrieux, Lucie Laurent, Minh-Pierre Le, Agnès Lefort, Elise Mallart, Jean-Denis Moyer, Yousra Kherabi, Emma Oliosi, Simon Raynal, Vinciane Rebours, Isabelle Rennuit, Olivier Roux, Trystan Sebastianutti, Damien Soudan, Carmen Stefanescu, Xavier Treton, Tristan Thibault Sogorb, Thomas Vauchel, Virginie Zarrouk

**Clinical Research technicians and students:** Kahina Lamrani, Massissilia Krouchi, Souhila Lacey, Lynda Lagha, Lilit Kelesyan, Adnan Mamodaly, Laurie Leguay, Paul Pechmajou, Laure Marchal, Lydia Meziane, Fatiha Mavouna, Cécile Pavis, Julien Matricon, Nathalie Gastellier,

**Biological resource center:** Frédéric Bert, Katell Peoc'h, Claude Hercend, Emmanuelle De Raucourt, Catherine Trichet

#### **AP-HP, Hôpital Saint-Louis and Université de Paris**

Saint-Louis CORE (COvid REsearch) group (G. Archer, J.D. Bouaziz, D. Bouda, D. Boutboul, Berthon I. Brindel, E. Bugnet, S. Caillat Zucman, S. Cassonnet, K. Celli Lebras, J. Chabert, S. Chevret, M. Clément, C. Davoine, N. De Castro, E. De Kerviler, C. De Margerie-Mellon, C. Delaugerre, F. Depret, B. Denis, L. Djaghout, C. Dupin, D. Farge-Bancel, C. Fauvaux, E. Feredj, D. Feyeux, J.P. Fontaine, V. Fremeaux-Bacchi, L. Galicier, S. Harel, Jegu AL, E. Kozakiewicz, M. Lebel, A. Baye, J. Le Goff, P. Le Guen, E. Lengline, G. Liegeon, G. Lorillon, I. Madelaine Chambrin, G. Martin de Frémont, M. Meunier, J.M. Molina, F. Morin, E. Oksenhendler, R. Peffault de la Tour, O. Peyrony, B. Plaud, M. Salmona, J. Sausseureau, and J. Soret) Swann Bredin, Thibault Dupont, Sofiane Fodil, Paul Gabarre, Natacha Kapandji, Thomas Longval, Clemence Marcault, Jean-Edouard Martin, Louis Perol, Anastasia Saade, Igor Theodose, Alexandre Verret, Élise Yvin, Marion Peyre

#### **AP-HP, Hôpital Lariboisière and Université de Paris**

**Clinicians having taken care of patients:** Albertini Mathieu, Amador Borrero Blanca, Bouajila Sara, Britany Kimbimbi, Burlacu Ruxandra, Cacoub Léa, Champion Karine, Chauvin Anthony, Delcey Véronique, Depond Audrey, Dillinger Jean-Guillaume, Feron Florine, Frazier Aline, Thomas Funck-Bretano, Galland Joris, Gauthier Diane-Cecile, Gautier Jean-François, Henry Patrick, Huscenot Tessa, Sarah Izabel Mathilde, Jaulerry, Jouabli Moenes, Julla Jean-Baptiste, Kevorkian Jean-Philippe, Laloï Michelin Marie, Leroy Pierre, Lopes Amanda, Mangin Olivier, Michon Maxime, Mouly Stéphane, Munier Anne-Lise, Nahmani Yoram, Nicol Martin, Nicolas Eroan, Poulat Audrey, Revue Eric, Richette Pascal, Riveline Jean-Pierre, Rubenstein Emma, Sellier Pierre-Olivier, Sene Damien, Thoreau Benjamin, Vodovar Dominique, Zanin Adrien, Aveneau Clément, Bastard Paul, Beauvais Diane, Boghez Loredana, Borderiou Alix, Conway Paul, Cosma Lavignia, Davy Vincent, Desjardin Clément, Devatine Sandra, Ducroz Gerardin Christel, Dupe Charlotte, Gobert Chloé, Gros Clotilde, Kadiri Soumaya, Khan Enmat, Ongnessek Sandrine, Rhmari Fatima, Sacco Isabelle, Saptefrat Natalia, Schaupp Pauline, Serre Justine, Sideris Georgios, Smati Sonia, Tournier Marine, treca Pauline, Truong Tony, Tuffier Mathilde, Arcelli Mattéo, Boue Yvonnick, Copie Alban, Deye Nicolas, Ekherian Jean-Michel, Errabih, Zaccaria, Gonde Antoine, Grant Caroline, Guerin Emmanuelle, Magalhaes Adèle, Malissin Isabelle, Megarbane Bruno, Meurisse Edouard, Mrad Aymen, Naim Giulia, Nguyen Philippe, Nitenberg Kiyoko, Pepin-Lehalleur Adrien, Perault Arthur, Perrin Lucile, Renaud Maxime, Sutterlin Laetitia, Voicu Sebastian

**AP-HP, Hôpital Avicenne and Université Paris-Nord Sorbonne University**

**Clinicians having taken care of patients:** Olivier Bouchaud, Johann Cailhol, Simon Chauveau, Morgane Didier Marcelot, Florence Cymbalista, Soline de Monteynard, Agnieszka Kolakowska, Florence Duperron, , Farid Foudi, Olivia Freynet, Florence Jeny, Warda Khamis, Sylvain Le Jeune, Marilucy Lopez Sublet, Frédéric Mechai, Elise Ouedraogo, Maxime Patout, Jaehyo Suhl, Yacine Tandjaoui-Lambiotte.

**Clinical Research technicians:** Amani Rebai, Miassa Slimani, Rawan Belmokhtar, Miassa Bentifraouine, Lina Innes Skandri, Houda Allalou, God Chancelly M Bayi Matondo

**AP-HP, Hôpital Cochin and Université Descartes**

**Clinicians having taken care of patients:** Luc Mouthon, Alexis Regent, Benjamin Terrier

**Clinical Research technicians and students:** Meriem Benfodda, Kamil Chitour, Gaelle Clavere, Jeanne Colombe, Firas Faraht, Caroline Gaudefroy, Moez Jallouli, Nathalie Menage, Alexandre Moores, Isabelle Peigney, Julie Rotureau, Mathilde Vallet, Alizée Verdon, Coralie Samba, Daniela Nylund, Casimir Jeantaud, Luka Lachiver, Sarah Larbi, Valentine Gloaguen, Emilie Chau, Patsy Vanhaesebrouck, Wendy Sok.

**AP-HP, Hôpital Henri Mondor and Université Paris-Est Créteil**

**Clinicians having taken care of patients:** Armand Mekontso Dessap, Nicolas De Prost, François Bagate, Keyvan Razazi, Philippe Le Corvoisier, Raphaelle Arrouasse, Jean-Daniel Lelievre, Jean-François Deux,

**Clinical Research technicians and students:** Mouhamed Dieng, Asunejad, Geoffrey Rossi, Charles Binette, Isabelle Veillard, Aurelie Wiedemann.

**AP-HP, Hôpital de la Pitié-Salpêtrière, Université Paris-Sorbonne**

**Clinical Research technicians and students:** Joe-Elie Sallem, Paul Gougis, Bruno Pina, Charlotte Fenioux, Diane Nguyen, Lamia Boukir, Kuberaka Mariampillai, Smail Ait Mohand, Céline Anquetil, Azzedine Arrassi, Anne Bertrand, Anne Bigot, Bruno Cadot, Dina Ferhat, Sarah Léonard-Louis, Xavière Lornage, Marion Masingue, Isabelle Nelson, France Pietri-Rouxel, Christian Pinset, Giorgia Querin, Dario Saracino, Tanya Stojkovic, Nadjib Taouagh, Capucine Trollet, Maryvonne Retail, Nathalie Jarry, Maura Rodriguez, Carine Lefort, Sarah Taieb-Tamacha, Alizé Chalançon.

**AP-HP, Hôpital Necker Enfants Malades and Université de Paris**

**Clinicians having taken care of patients:** Nada Aboumerouane, Genevieve Afantchao, Lucile Amrouche, Dany Anglicheau, Sylvain Auvity, Melanie Brunel, Lucienne Chatenoud, Anna DiMarzio, Marine Driessen, Lionel Lamhaut , Vanessa Lopez, Perrine Parize, Laurent Sabbah, Rebecca Sberro-Soussan, Anne Scemla, Scarlett Wise, Julien Zuber

**Clinical Research technicians and students:** Sylvain Goupil, Marie-Noelle Halley, Meriem Imarazene, Jouda Marouene, Fabio Mecozzi, Lilia Toumi

**AP-HP, Hôpital Paul Brousse and Université Paris-Saclay**

**Clinicians having taken care of patients:** Philippe Ichai, Marie-Amélie Ordan, Audrey Coilly,

**Dean of the Université Paris-Saclay Medical School** for having provided students serving as research technicians: Didier Samuel

**Institut Gustave Roussy and Université Paris-Saclay**

Giulia Baciarello, Thomas Hueso, Alain Gaffinel, Franck Griscelli, Fabrice Barlesi, Jean-Charles Soria, Benjamin Besse, Laurence Albiges, Julie Laurence, Camille Sallee, Bertrand Gachot, Julien Hadoux, Nolwenn Lucas, Geraldine Martinez, Marie-Pollen Moulle, Isabelle Rousseau, Kahina Chetouane, Frédéric Troalen.

**Hôpital Privé d'Antony**

**Clinicians having taken care of patients:** Gilles Garcia, Anne Herkert, Véronique Zarka, Elias Dabboura, Abolfazl Mohebbi, Michel Benhamou, Jean-Pierre Deyme, Olivier Andreumont, Benoit Vandebunder, Franck Le Queau, Jean-Charles Gagnard, Joël Livartowski, Catherine Heyraud-Blanchet.

**Hôpital de Valenciennes**

**Clinicians having taken care of patients:** Fabien Lambiotte, Laura Wayenberg, Nabil Elbeki, Sylvie Fontaine, Justine Lemtiri, Adeline Maitte,

**Pharmacy:** Mohamed Ait Sidi Ali

**Hôpital de Saint-Denis**

***Clinicians having taken care of patients:*** Antoine Casel, Elisa Pasqualoni, Rita Dujon, Fanny Jouan, Stéphanie Ngo, François Lhote, Marion Dollat, Marie Poupard, Marie-Aude Khuong, Remi Lefrançois, Carole Henry, Naomi Sayre.
